# Supplementary material for: Burden of disease in francophone Africa, 1990–2017: a systematic analysis for the Global Burden of Disease Study 2017
Source: PubMed Central journal article supplement (PMC7034333; doi:10.1016/s2214-109x(20)30024-3), 2020-02-19
Supplement: mmc2.pdf [file mmc2.pdf]

# THE LANCET

## Global Health

### Supplementary appendix 2

This appendix formed part of the original submission and has been peer reviewed. We post it as supplied by the authors.

Supplement to: El Bcheraoui C, Mimche H, Miangotay Y, et al. Burden of disease in francophone Africa, 1990–2017: a systematic analysis for the Global Burden of Disease Study 2017. *Lancet Glob Health* 2020; **8**: e341–51.

## Contents

|                                                                                                                                                                                                                                                                                                                                                                                                                                                                       |    |
|-----------------------------------------------------------------------------------------------------------------------------------------------------------------------------------------------------------------------------------------------------------------------------------------------------------------------------------------------------------------------------------------------------------------------------------------------------------------------|----|
| Table 1: Distribution of francophone African countries (marked by an asterisk), along with their non-francophone counterparts, by economic groups, and sociodemographic index (SDI) .....                                                                                                                                                                                                                                                                             | 3  |
| Table 2: Causes of death levels of cause hierarchy .....                                                                                                                                                                                                                                                                                                                                                                                                              | 4  |
| Figure 1: Leading causes of death and their evolution, all ages, Economic Community of West African States, francophone countries, 1990–2017 ....                                                                                                                                                                                                                                                                                                                     | 14 |
| Figure 2: Leading causes of death and their evolution, all ages, Economic Community of West African States, non-francophone countries, 1990–2017 .....                                                                                                                                                                                                                                                                                                                | 15 |
| Figure 3: Leading causes of death and their evolution, all ages, Economic Community of Central African States, francophone countries, 1990–2017.                                                                                                                                                                                                                                                                                                                      | 16 |
| Figure 4: Leading causes of death and their evolution, all ages, Economic Community of Central African States, non-francophone countries, 1990–2017 .....                                                                                                                                                                                                                                                                                                             | 17 |
| Figure 5: Leading causes of death and their evolution, all ages, Southern African Development Community, francophone countries, 1990–2017 .....                                                                                                                                                                                                                                                                                                                       | 18 |
| Figure 6: Leading causes of death and their evolution, all ages, Southern African Development Community, non-francophone countries, 1990–2017                                                                                                                                                                                                                                                                                                                         | 19 |
| Figure 7: main causes of years of life lost and their evolution, all ages, francophone Africa, 1990–2017.....                                                                                                                                                                                                                                                                                                                                                         | 20 |
| Figure 8: main causes of years of life lost and their evolution, all ages, non-francophone Africa, 1990–2017.....                                                                                                                                                                                                                                                                                                                                                     | 21 |
| Figure 9: Disability-adjusted life-years (DALYs) per 100,000 population, and uncertainty intervals (black segments), all ages, by sex and country, francophone Africa, 2017 .....                                                                                                                                                                                                                                                                                     | 22 |
| Figure 10: Risk factors by disability-adjusted life years, francophone Africa, 2017 .....                                                                                                                                                                                                                                                                                                                                                                             | 23 |
| Figure 11: Decomposition of change among the 30 main causes of death due to population growth, population ageing, and age- and cause-specific mortality rate, francophone Africa, 1990–2017. For example, in the case on Alzheimer’s disease and other dementias, age- and cause-specific mortality have contributed to a small decrease in DALYs, but population growth and population ageing drove a large increase making the total percent change about 130%..... | 24 |
| Figure 12: Years lived with disability (YLDs) in francophone (labeled to the right) and non-francophone (labelled to the left) countries, within the three economic communities .....                                                                                                                                                                                                                                                                                 | 25 |
| Table 3: Deaths, years of life lost (YLLs), years lived with disability (YLDs), and disability-adjusted life-years (DALYs) in 1990 and 2017, and life expectancy, expected DALYs, sociodemographic index (SDI) in 2017, and percent change in SDI between 1990 and 2017 .....                                                                                                                                                                                         | 26 |

Table 4 : Cause of death star rating for vital registration systems, francophone Africa.....28

Table 1: Distribution of francophone African countries (marked by an asterisk), along with their non-francophone counterparts, by economic groups, and sociodemographic index (SDI)

| <b>Economic Community of West African States (SDI)</b> | <b>Economic Community of Central African States (SDI)</b> | <b>Southern African Development Community (SDI)</b> |
|--------------------------------------------------------|-----------------------------------------------------------|-----------------------------------------------------|
| Benin* (0.37)                                          | Burundi* (0.31)                                           | Comoros* (0.43)                                     |
| Burkina Faso* (0.28)                                   | Central African Republic* (0.33)                          | Democratic Republic of the Congo* (0.36)            |
| Cote d'Ivoire* (0.41)                                  | Cameroon* (0.48)                                          | Madagascar* (0.33)                                  |
| Guinea* (0.32)                                         | Chad* (0.25)                                              | Seychelles* (0.69)                                  |
| Guinea Bissau* (0.35)                                  | Congo* (0.57)                                             | Angola (0.46)                                       |
| Mali* (0.27)                                           | Democratic Republic of the Congo* (0.36)                  | Botswana (0.66)                                     |
| Niger* (0.19)                                          | Equatorial Guinea* (0.63)                                 | Lesotho (0.49)                                      |
| Senegal* (0.37)                                        | Gabon* (0.65)                                             | Malawi (0.35)                                       |
| Togo* (0.41)                                           | Rwanda* (0.41)                                            | Mauritius (0.72)                                    |
| Cape Verde (0.55)                                      | Angola (0.46)                                             | Mozambique (0.34)                                   |
| Ghana (0.54)                                           | Sao Tome and Principe (0.49)                              | Namibia (0.62)                                      |
| Liberia (0.33)                                         |                                                           | South Africa (0.68)                                 |
| Nigeria (0.49)                                         |                                                           | Swaziland (0.58)                                    |
| Sierra Leone (0.36)                                    |                                                           | Tanzania (0.41)                                     |
| The Gambia (0.40)                                      |                                                           | Zambia (0.47)                                       |
|                                                        |                                                           | Zimbabwe (0.46)                                     |

Table 2: Causes of death levels of cause hierarchy

| Level | Cause name                                                                    | Cause outline |
|-------|-------------------------------------------------------------------------------|---------------|
| 0     | All causes                                                                    | Total         |
| 1     | Communicable, maternal, neonatal, and nutritional disorders                   | A             |
| 2     | HIV/AIDS and sexually transmitted infections                                  | A.1           |
| 3     | HIV/AIDS                                                                      | A.1.1         |
| 4     | HIV/AIDS - Drug-susceptible Tuberculosis                                      | A.1.1.1       |
| 4     | HIV/AIDS - Multidrug-resistant Tuberculosis without extensive drug resistance | A.1.1.2       |
| 4     | HIV/AIDS - Extensively drug-resistant Tuberculosis                            | A.1.1.3       |
| 4     | HIV/AIDS resulting in other diseases                                          | A.1.1.4       |
| 3     | Sexually transmitted infections excluding HIV                                 | A.1.2         |
| 4     | Syphilis                                                                      | A.1.2.1       |
| 4     | Chlamydial infection                                                          | A.1.2.2       |
| 4     | Gonococcal infection                                                          | A.1.2.3       |
| 4     | Other sexually transmitted infections                                         | A.1.2.6       |
| 2     | Respiratory infections and tuberculosis                                       | A.2           |
| 3     | Tuberculosis                                                                  | A.2.1         |
| 4     | Drug-susceptible tuberculosis                                                 | A.2.1.2       |
| 4     | Multidrug-resistant tuberculosis without extensive drug resistance            | A.2.1.3       |
| 4     | Extensively drug-resistant tuberculosis                                       | A.2.1.4       |
| 3     | Lower respiratory infections                                                  | A.2.2         |
| 3     | Upper respiratory infections                                                  | A.2.3         |
| 3     | Otitis media                                                                  | A.2.4         |
| 2     | Enteric infections                                                            | A.3           |
| 3     | Diarrhoeal diseases                                                           | A.3.1         |
| 3     | Typhoid and paratyphoid                                                       | A.3.2         |
| 4     | Typhoid fever                                                                 | A.3.2.1       |
| 4     | Paratyphoid fever                                                             | A.3.2.2       |
| 3     | iNTS                                                                          | A.3.3         |
| 3     | Other intestinal infectious diseases                                          | A.3.5         |

|   |                                         |          |
|---|-----------------------------------------|----------|
| 2 | Neglected tropical diseases and malaria | A.4      |
| 3 | Malaria                                 | A.4.1    |
| 3 | Chagas disease                          | A.4.2    |
| 3 | Leishmaniasis                           | A.4.3    |
| 4 | Visceral leishmaniasis                  | A.4.3.1  |
| 3 | African trypanosomiasis                 | A.4.4    |
| 3 | Schistosomiasis                         | A.4.5    |
| 3 | Cysticercosis                           | A.4.6    |
| 3 | Cystic echinococcosis                   | A.4.7    |
| 3 | Dengue                                  | A.4.11   |
| 3 | Yellow fever                            | A.4.12   |
| 3 | Rabies                                  | A.4.13   |
| 3 | Intestinal nematode infections          | A.4.14   |
| 4 | Ascariasis                              | A.4.14.1 |
| 3 | Ebola virus disease                     | A.4.17   |
| 3 | Zika virus disease                      | A.4.18   |
| 3 | Other neglected tropical diseases       | A.4.20   |
| 2 | Other infectious diseases               | A.5      |
| 3 | Meningitis                              | A.5.1    |
| 4 | Pneumococcal meningitis                 | A.5.1.1  |
| 4 | H influenzae type B meningitis          | A.5.1.2  |
| 4 | Meningococcal infection                 | A.5.1.3  |
| 4 | Other meningitis                        | A.5.1.4  |
| 3 | Encephalitis                            | A.5.2    |
| 3 | Diphtheria                              | A.5.3    |
| 3 | Whooping cough                          | A.5.4    |
| 3 | Tetanus                                 | A.5.5    |
| 3 | Measles                                 | A.5.6    |
| 3 | Varicella and herpes zoster             | A.5.7    |
| 3 | Acute hepatitis                         | A.5.8    |
| 4 | Acute hepatitis A                       | A.5.8.1  |

|   |                                                          |          |
|---|----------------------------------------------------------|----------|
| 4 | Acute hepatitis B                                        | A.5.8.2  |
| 4 | Acute hepatitis C                                        | A.5.8.3  |
| 4 | Acute hepatitis E                                        | A.5.8.4  |
| 3 | Other unspecified infectious diseases                    | A.5.9    |
| 2 | Maternal and neonatal disorders                          | A.6      |
| 3 | Maternal disorders                                       | A.6.1    |
| 4 | Maternal haemorrhage                                     | A.6.1.1  |
| 4 | Maternal sepsis and other pregnancy related infections   | A.6.1.2  |
| 4 | Maternal hypertensive disorders                          | A.6.1.3  |
| 4 | Maternal obstructed labour and uterine rupture           | A.6.1.4  |
| 4 | Maternal abortive outcome                                | A.6.1.5  |
| 4 | Ectopic pregnancy                                        | A.6.1.6  |
| 4 | Indirect maternal deaths                                 | A.6.1.7  |
| 4 | Late maternal deaths                                     | A.6.1.8  |
| 4 | Maternal deaths aggravated by HIV/AIDS                   | A.6.1.9  |
| 4 | Other maternal disorders                                 | A.6.1.10 |
| 3 | Neonatal disorders                                       | A.6.2    |
| 4 | Neonatal preterm birth                                   | A.6.2.1  |
| 4 | Neonatal encephalopathy due to birth asphyxia and trauma | A.6.2.2  |
| 4 | Neonatal sepsis and other neonatal infections            | A.6.2.3  |
| 4 | Hemolytic disease and other neonatal jaundice            | A.6.2.4  |
| 4 | Other neonatal disorders                                 | A.6.2.5  |
| 2 | Nutritional deficiencies                                 | A.7      |
| 3 | Protein-energy malnutrition                              | A.7.1    |
| 3 | Other nutritional deficiencies                           | A.7.5    |
| 1 | Non-communicable diseases                                | B        |
| 2 | Neoplasms                                                | B.1      |
| 3 | Lip and oral cavity cancer                               | B.1.1    |
| 3 | Nasopharynx cancer                                       | B.1.2    |
| 3 | Other pharynx cancer                                     | B.1.3    |
| 3 | Oesophageal cancer                                       | B.1.4    |

|   |                                                    |          |
|---|----------------------------------------------------|----------|
| 3 | Stomach cancer                                     | B.1.5    |
| 3 | Colon and rectum cancer                            | B.1.6    |
| 3 | Liver cancer                                       | B.1.7    |
| 4 | Liver cancer due to hepatitis B                    | B.1.7.1  |
| 4 | Liver cancer due to hepatitis C                    | B.1.7.2  |
| 4 | Liver cancer due to alcohol use                    | B.1.7.3  |
| 4 | Liver cancer due to NASH                           | B.1.7.4  |
| 4 | Liver cancer due to other causes                   | B.1.7.5  |
| 3 | Gallbladder and biliary tract cancer               | B.1.8    |
| 3 | Pancreatic cancer                                  | B.1.9    |
| 3 | Larynx cancer                                      | B.1.10   |
| 3 | Tracheal, bronchus, and lung cancer                | B.1.11   |
| 3 | Malignant skin melanoma                            | B.1.12   |
| 3 | Non-melanoma skin cancer                           | B.1.13   |
| 4 | Non-melanoma skin cancer (squamous-cell carcinoma) | B.1.13.1 |
| 3 | Breast cancer                                      | B.1.14   |
| 3 | Cervical cancer                                    | B.1.15   |
| 3 | Uterine cancer                                     | B.1.16   |
| 3 | Ovarian cancer                                     | B.1.17   |
| 3 | Prostate cancer                                    | B.1.18   |
| 3 | Testicular cancer                                  | B.1.19   |
| 3 | Kidney cancer                                      | B.1.20   |
| 3 | Bladder cancer                                     | B.1.21   |
| 3 | Brain and nervous system cancer                    | B.1.22   |
| 3 | Thyroid cancer                                     | B.1.23   |
| 3 | Mesothelioma                                       | B.1.24   |
| 3 | Hodgkin lymphoma                                   | B.1.25   |
| 3 | Non-Hodgkin's lymphoma                             | B.1.26   |
| 3 | Multiple myeloma                                   | B.1.27   |
| 3 | Leukaemia                                          | B.1.28   |
| 4 | Acute lymphoid leukaemia                           | B.1.28.1 |



|   |                                                                        |          |
|---|------------------------------------------------------------------------|----------|
| 4 | Chronic lymphoid leukaemia                                             | B.1.28.2 |
| 4 | Acute myeloid leukaemia                                                | B.1.28.3 |
| 4 | Chronic myeloid leukaemia                                              | B.1.28.4 |
| 4 | Other leukaemia                                                        | B.1.28.5 |
| 3 | Other malignant cancers                                                | B.1.29   |
| 3 | Other neoplasms                                                        | B.1.30   |
| 4 | Myelodysplastic, myeloproliferative, and other hematopoietic neoplasms | B.1.30.1 |
| 4 | Other benign and in situ neoplasms                                     | B.1.30.4 |
| 2 | Cardiovascular diseases                                                | B.2      |
| 3 | Rheumatic heart disease                                                | B.2.1    |
| 3 | Ischaemic heart disease                                                | B.2.2    |
| 3 | Stroke                                                                 | B.2.3    |
| 4 | Ischaemic stroke                                                       | B.2.3.1  |
| 4 | Intracerebral hemorrhage                                               | B.2.3.2  |
| 4 | Subarachnoid hemorrhage                                                | B.2.3.3  |
| 3 | Hypertensive heart disease                                             | B.2.4    |
| 3 | Non-rheumatic valvular heart disease                                   | B.2.5    |
| 4 | Non-rheumatic calcific aortic valve disease                            | B.2.5.1  |
| 4 | Non-rheumatic degenerative mitral valve disease                        | B.2.5.2  |
| 4 | Other non-rheumatic valve diseases                                     | B.2.5.3  |
| 3 | Cardiomyopathy and myocarditis                                         | B.2.6    |
| 4 | Myocarditis                                                            | B.2.6.1  |
| 4 | Alcoholic cardiomyopathy                                               | B.2.6.2  |
| 4 | Other cardiomyopathy                                                   | B.2.6.3  |
| 3 | Atrial fibrillation and flutter                                        | B.2.7    |
| 3 | Aortic aneurysm                                                        | B.2.8    |
| 3 | Peripheral vascular disease                                            | B.2.9    |
| 3 | Endocarditis                                                           | B.2.10   |
| 3 | Other cardiovascular and circulatory diseases                          | B.2.11   |
| 2 | Chronic respiratory diseases                                           | B.3      |
| 3 | Chronic obstructive pulmonary disease                                  | B.3.1    |

|   |                                                                |         |
|---|----------------------------------------------------------------|---------|
| 3 | Pneumoconiosis                                                 | B.3.2   |
| 4 | Silicosis                                                      | B.3.2.1 |
| 4 | Asbestosis                                                     | B.3.2.2 |
| 4 | Coal workers pneumoconiosis                                    | B.3.2.3 |
| 4 | Other pneumoconiosis                                           | B.3.2.4 |
| 3 | Asthma                                                         | B.3.3   |
| 3 | Interstitial lung disease and pulmonary sarcoidosis            | B.3.4   |
| 3 | Other chronic respiratory diseases                             | B.3.5   |
| 2 | Digestive diseases                                             | B.4     |
| 3 | Cirrhosis and other chronic liver diseases                     | B.4.1   |
| 4 | Cirrhosis and other chronic liver diseases due to hepatitis B  | B.4.1.1 |
| 4 | Cirrhosis and other chronic liver diseases due to hepatitis C  | B.4.1.2 |
| 4 | Cirrhosis and other chronic liver diseases due to alcohol use  | B.4.1.3 |
| 4 | Cirrhosis due to NASH                                          | B.4.1.4 |
| 4 | Cirrhosis and other chronic liver diseases due to other causes | B.4.1.5 |
| 3 | Upper digestive system diseases                                | B.4.2   |
| 4 | Peptic ulcer disease                                           | B.4.2.1 |
| 4 | Gastritis and duodenitis                                       | B.4.2.2 |
| 3 | Appendicitis                                                   | B.4.3   |
| 3 | Paralytic ileus and intestinal obstruction                     | B.4.4   |
| 3 | Inguinal, femoral, and abdominal hernia                        | B.4.5   |
| 3 | Inflammatory bowel disease                                     | B.4.6   |
| 3 | Vascular intestinal disorders                                  | B.4.7   |
| 3 | Gallbladder and biliary diseases                               | B.4.8   |
| 3 | Pancreatitis                                                   | B.4.9   |
| 3 | Other digestive diseases                                       | B.4.10  |
| 2 | Neurological disorders                                         | B.5     |
| 3 | Alzheimer's disease and other dementias                        | B.5.1   |
| 3 | Parkinson's disease                                            | B.5.2   |
| 3 | Epilepsy                                                       | B.5.3   |
| 3 | Multiple sclerosis                                             | B.5.4   |
| 3 | Motor neuron disease                                           | B.5.5   |

|   |                                                            |         |
|---|------------------------------------------------------------|---------|
| 3 | Other neurological disorders                               | B.5.7   |
| 2 | Mental disorders                                           | B.6     |
| 3 | Eating disorders                                           | B.6.5   |
| 4 | Anorexia nervosa                                           | B.6.5.1 |
| 4 | Bulimia nervosa                                            | B.6.5.2 |
| 2 | Substance use disorders                                    | B.7     |
| 3 | Alcohol use disorders                                      | B.7.1   |
| 3 | Drug use disorders                                         | B.7.2   |
| 4 | Opioid use disorders                                       | B.7.2.1 |
| 4 | Cocaine use disorders                                      | B.7.2.2 |
| 4 | Amphetamine use disorders                                  | B.7.2.3 |
| 4 | Other drug use disorders                                   | B.7.2.5 |
| 2 | Diabetes and kidney diseases                               | B.8     |
| 3 | Diabetes mellitus                                          | B.8.1   |
| 4 | Diabetes mellitus type 1                                   | B.8.1.1 |
| 4 | Diabetes mellitus type 2                                   | B.8.1.2 |
| 3 | Chronic kidney disease                                     | B.8.2   |
| 4 | Chronic kidney disease due to diabetes mellitus type 1     | B.8.2.1 |
| 4 | Chronic kidney disease due to diabetes mellitus type 2     | B.8.2.2 |
| 4 | Chronic kidney disease due to hypertension                 | B.8.2.3 |
| 4 | Chronic kidney disease due to glomerulonephritis           | B.8.2.4 |
| 4 | Chronic kidney disease due to other and unspecified causes | B.8.2.5 |
| 3 | Acute glomerulonephritis                                   | B.8.3   |
| 2 | Skin and subcutaneous diseases                             | B.9     |
| 3 | Bacterial skin diseases                                    | B.9.3   |
| 4 | Cellulitis                                                 | B.9.3.1 |
| 4 | Pyoderma                                                   | B.9.3.2 |
| 3 | Decubitus ulcer                                            | B.9.11  |
| 3 | Other skin and subcutaneous diseases                       | B.9.12  |
| 2 | Musculoskeletal disorders                                  | B.11    |
| 3 | Rheumatoid arthritis                                       | B.11.1  |

|   |                                                   |           |
|---|---------------------------------------------------|-----------|
| 3 | Other musculoskeletal disorders                   | B.11.6    |
| 2 | Other non-communicable diseases                   | B.12      |
| 3 | Congenital anomalies                              | B.12.1    |
| 4 | Neural tube defects                               | B.12.1.1  |
| 4 | Congenital heart anomalies                        | B.12.1.2  |
| 4 | Orofacial clefts                                  | B.12.1.3  |
| 4 | Down's syndrome                                   | B.12.1.4  |
| 4 | Other chromosomal abnormalities                   | B.12.1.7  |
| 4 | Congenital musculoskeletal and limb anomalies     | B.12.1.8  |
| 4 | Urogenital congenital anomalies                   | B.12.1.9  |
| 4 | Digestive congenital anomalies                    | B.12.1.10 |
| 4 | Other congenital anomalies                        | B.12.1.11 |
| 3 | Urinary diseases and male infertility             | B.12.2    |
| 4 | Urinary tract infections                          | B.12.2.1  |
| 4 | Urolithiasis                                      | B.12.2.2  |
| 4 | Other urinary diseases                            | B.12.2.5  |
| 3 | Gynecological diseases                            | B.12.3    |
| 4 | Uterine fibroids                                  | B.12.3.1  |
| 4 | Polycystic ovarian syndrome                       | B.12.3.2  |
| 4 | Endometriosis                                     | B.12.3.4  |
| 4 | Genital prolapse                                  | B.12.3.5  |
| 4 | Other gynecological diseases                      | B.12.3.7  |
| 3 | Hemoglobinopathies and hemolytic anaemias         | B.12.4    |
| 4 | Thalasseмии                                       | B.12.4.1  |
| 4 | Sickle cell disorders                             | B.12.4.3  |
| 4 | G6PD deficiency                                   | B.12.4.5  |
| 4 | Other hemoglobinopathies and hemolytic anaemias   | B.12.4.7  |
| 3 | Endocrine, metabolic, blood, and immune disorders | B.12.5    |
| 3 | Sudden infant death syndrome                      | B.12.7    |
| 1 | Injuries                                          | C         |
| 2 | Transport injuries                                | C.1       |

|   |                                                 |         |
|---|-------------------------------------------------|---------|
| 3 | Road injuries                                   | C.1.1   |
| 4 | Pedestrian road injuries                        | C.1.1.1 |
| 4 | Cyclist road injuries                           | C.1.1.2 |
| 4 | Motorcyclist road injuries                      | C.1.1.3 |
| 4 | Motor vehicle road injuries                     | C.1.1.4 |
| 4 | Other road injuries                             | C.1.1.5 |
| 3 | Other transport injuries                        | C.1.2   |
| 2 | Unintentional injuries                          | C.2     |
| 3 | Falls                                           | C.2.1   |
| 3 | Drowning                                        | C.2.2   |
| 3 | Fire, heat, and hot substances                  | C.2.3   |
| 3 | Poisonings                                      | C.2.4   |
| 4 | Poisoning by carbon monoxide                    | C.2.4.1 |
| 4 | Poisoning by other means                        | C.2.4.2 |
| 3 | Exposure to mechanical forces                   | C.2.5   |
| 4 | Unintentional firearm injuries                  | C.2.5.1 |
| 4 | Other exposure to mechanical forces             | C.2.5.2 |
| 3 | Adverse effects of medical treatment            | C.2.6   |
| 3 | Animal contact                                  | C.2.7   |
| 4 | Venomous animal contact                         | C.2.7.1 |
| 4 | Non-venomous animal contact                     | C.2.7.2 |
| 3 | Foreign body                                    | C.2.8   |
| 4 | Pulmonary aspiration and foreign body in airway | C.2.8.1 |
| 4 | Foreign body in other body part                 | C.2.8.3 |
| 3 | Environmental heat and cold exposure            | C.2.9   |
| 3 | Exposure to forces of nature                    | C.2.10  |
| 3 | Other unintentional injuries                    | C.2.11  |
| 2 | Self-harm and interpersonal violence            | C.3     |
| 3 | Self-harm                                       | C.3.1   |
| 4 | Self-harm by firearm                            | C.3.1.1 |
| 4 | Self-harm by other specified means              | C.3.1.2 |

|   |                                |         |
|---|--------------------------------|---------|
| 3 | Interpersonal violence         | C.3.2   |
| 4 | Assault by firearm             | C.3.2.1 |
| 4 | Assault by sharp object        | C.3.2.2 |
| 4 | Assault by other means         | C.3.2.4 |
| 3 | Conflict and terrorism         | C.3.3   |
| 3 | Executions and police conflict | C.3.4   |

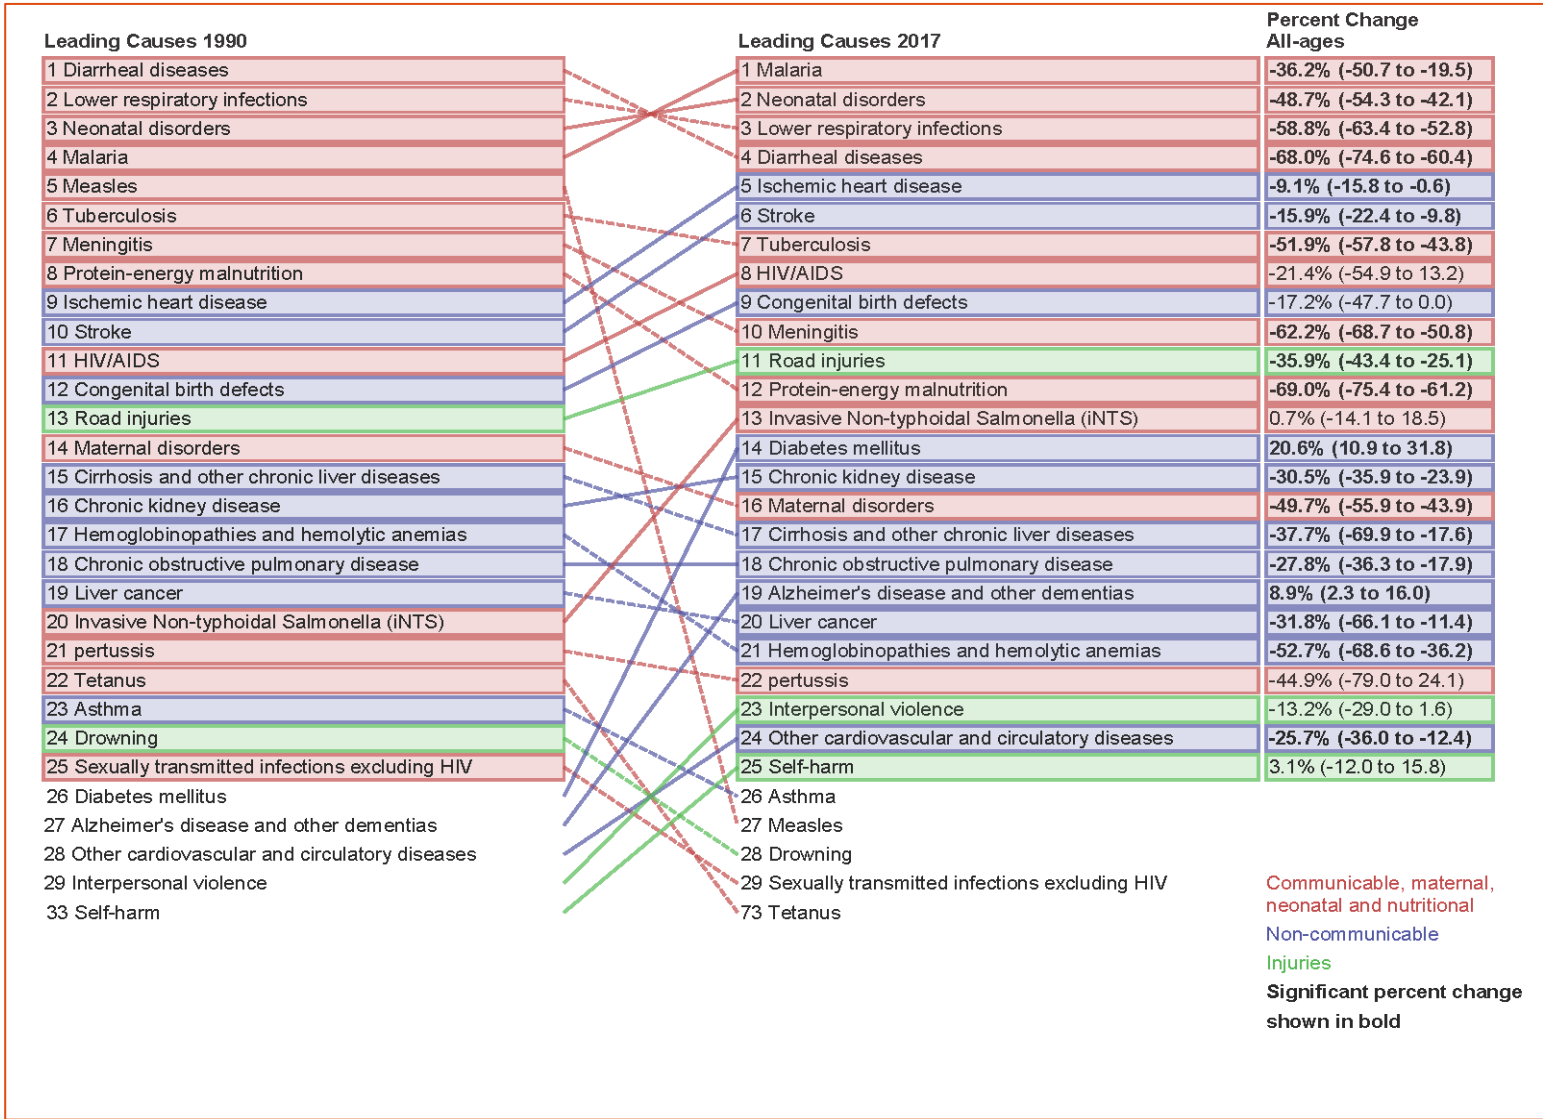

Figure 1: Leading causes of death and their evolution, all ages, Economic Community of West African States, francophone countries, 1990–2017

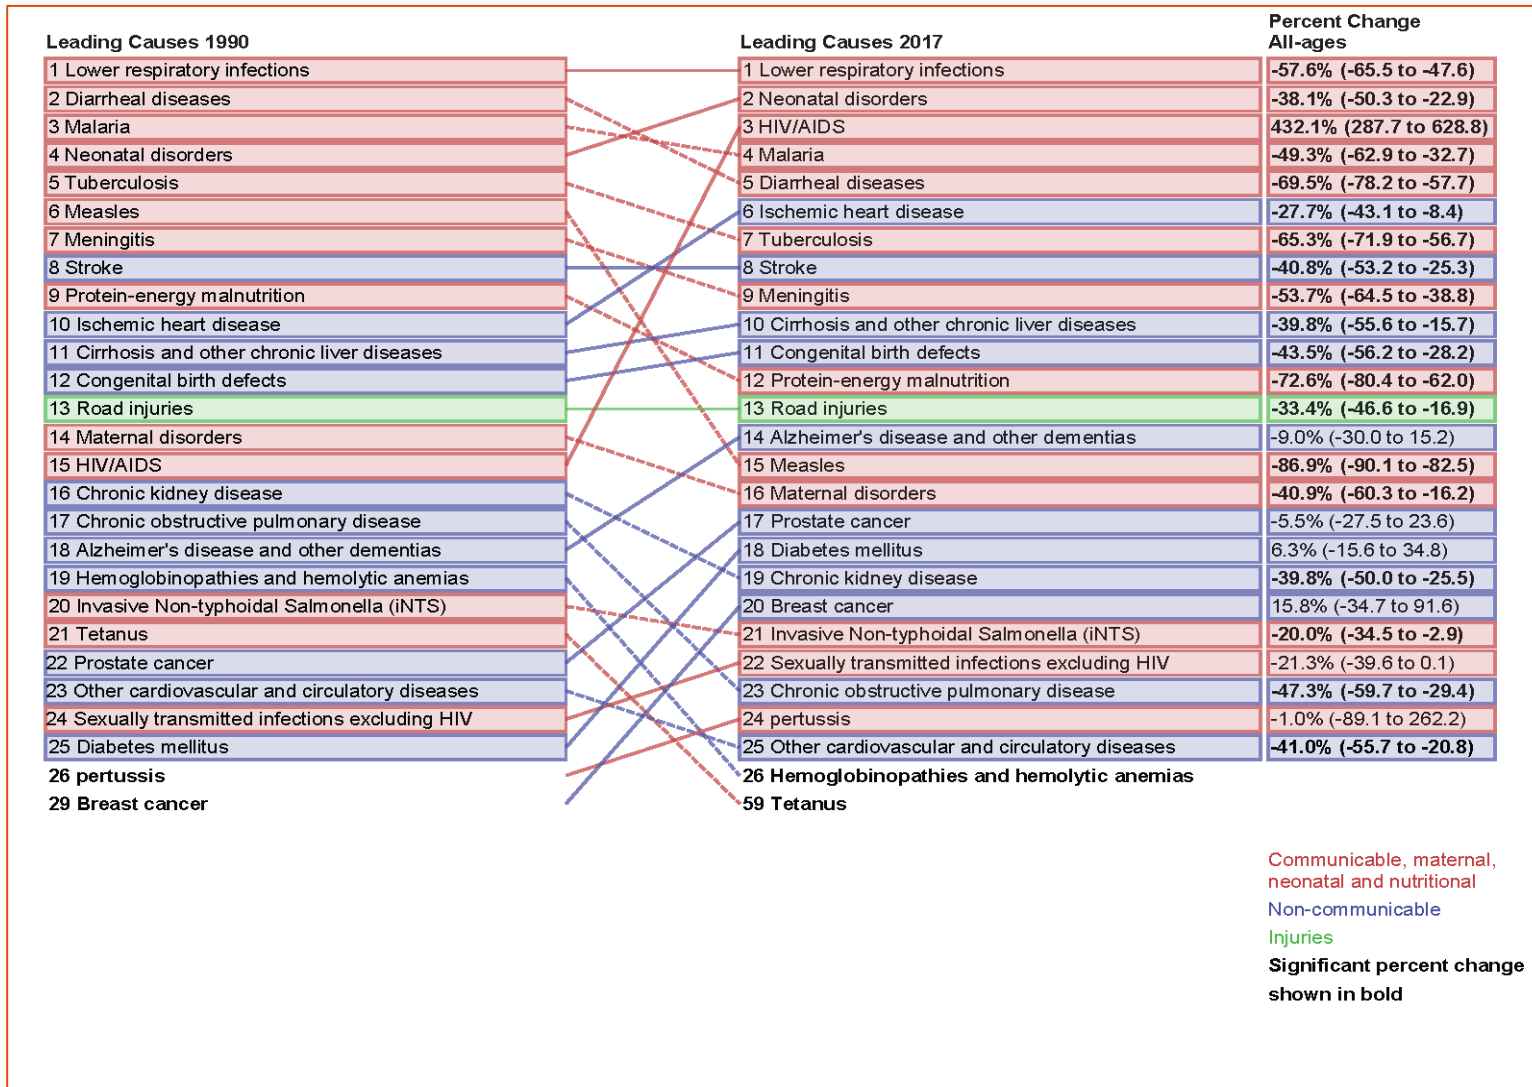

Figure 2: Leading causes of death and their evolution, all ages, Economic Community of West African States, non-francophone countries, 1990–2017



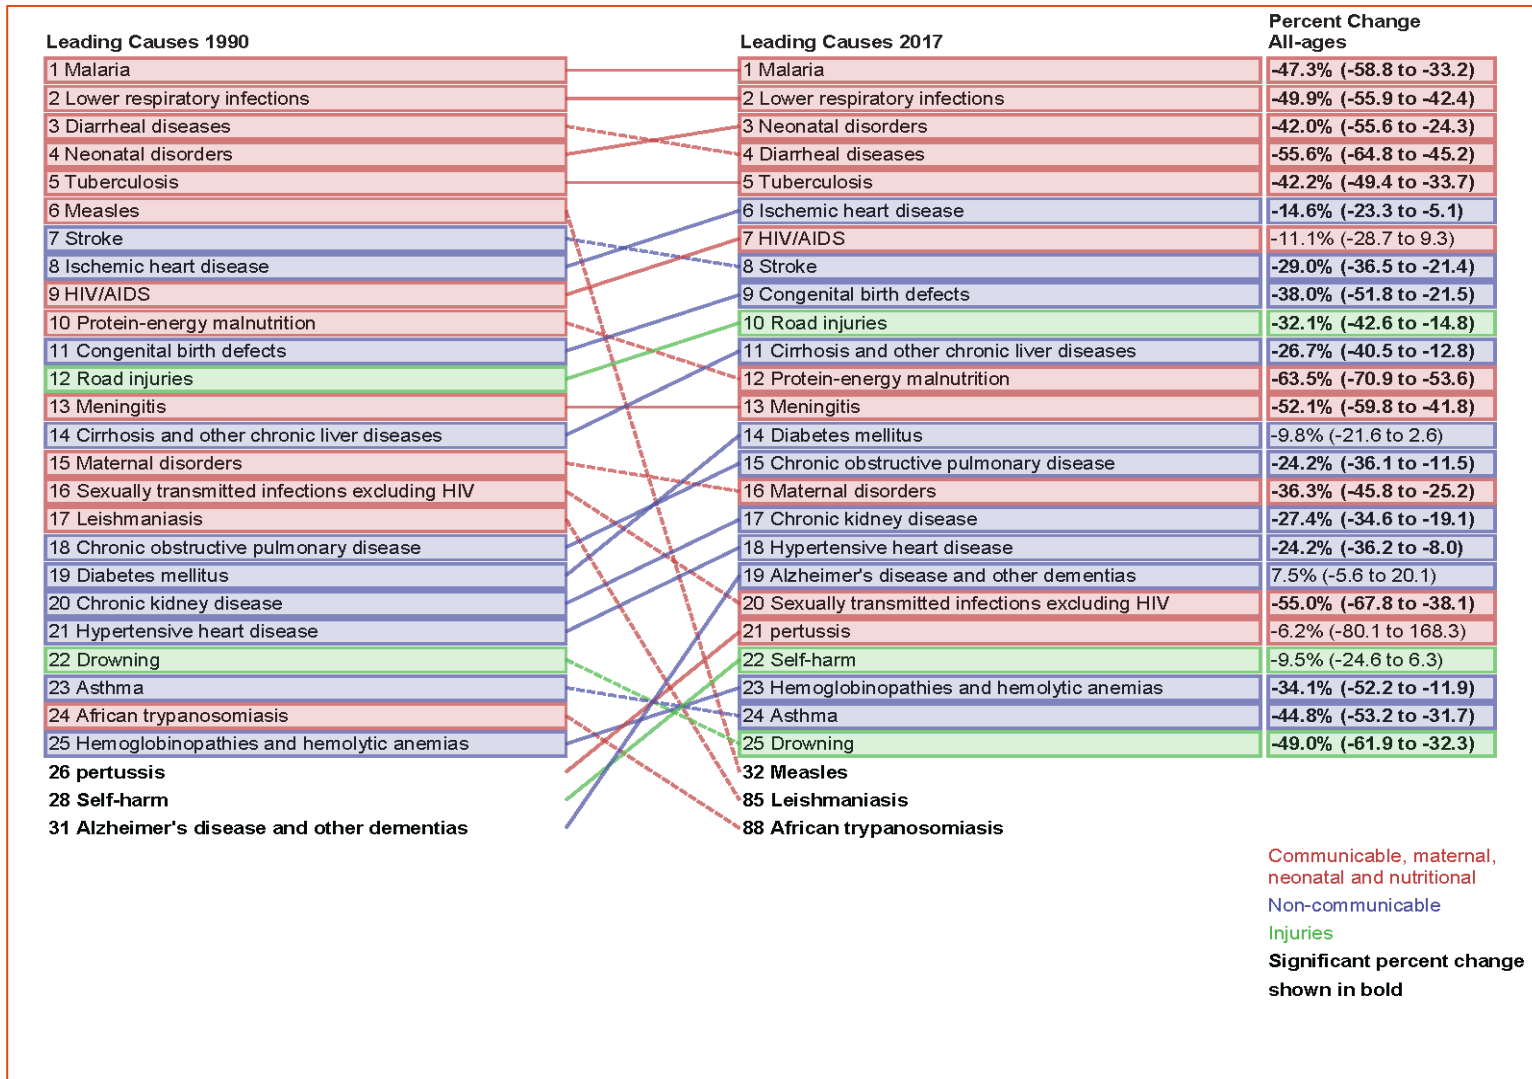

Figure 3: Leading causes of death and their evolution, all ages, Economic Community of Central African States, francophone countries, 1990–2017

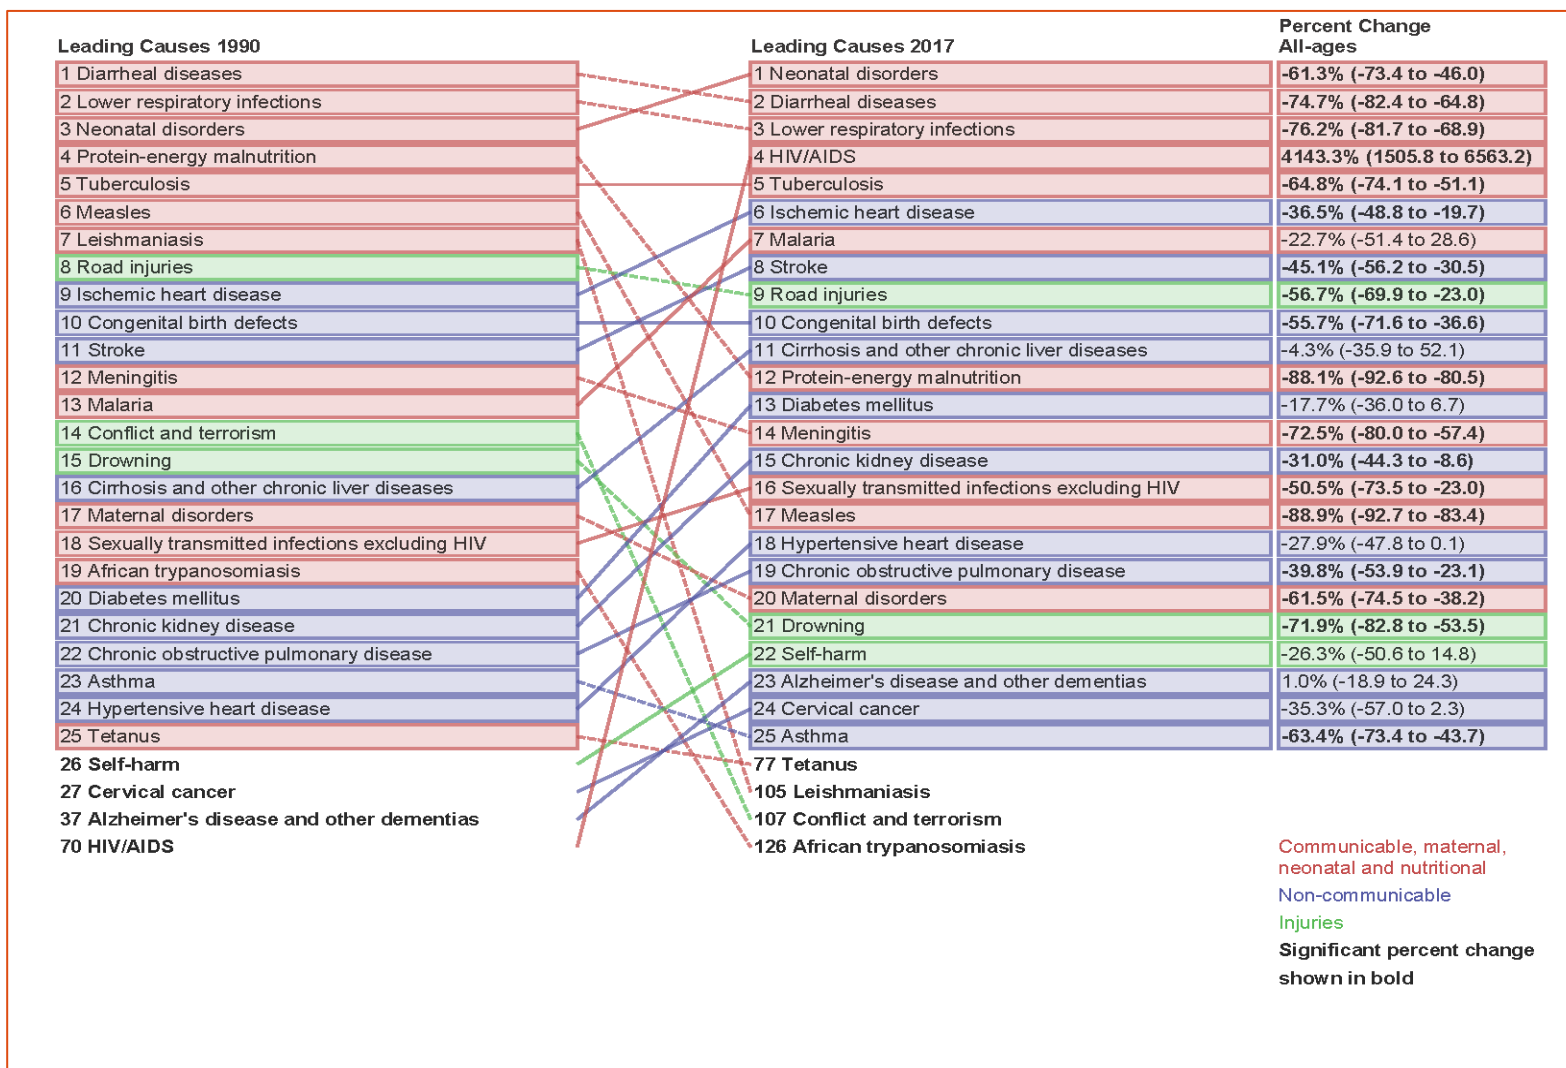

Figure 4: Leading causes of death and their evolution, all ages, Economic Community of Central African States, non-francophone countries, 1990–2017

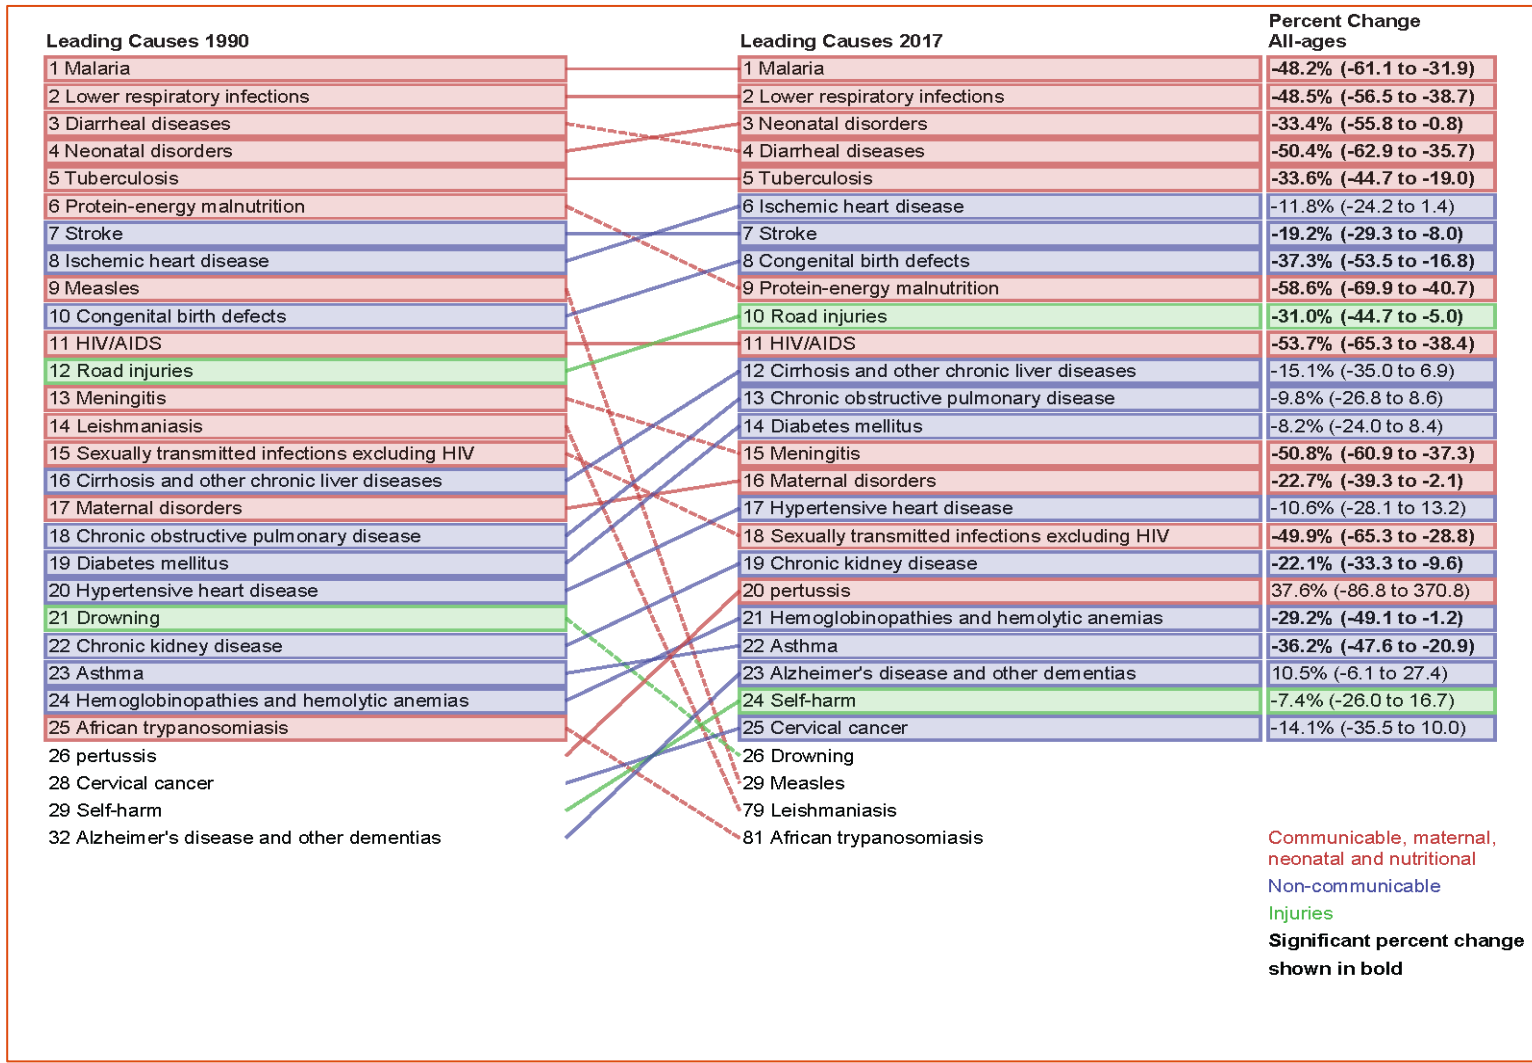

Figure 5: Leading causes of death and their evolution, all ages, Southern African Development Community, francophone countries, 1990–2017

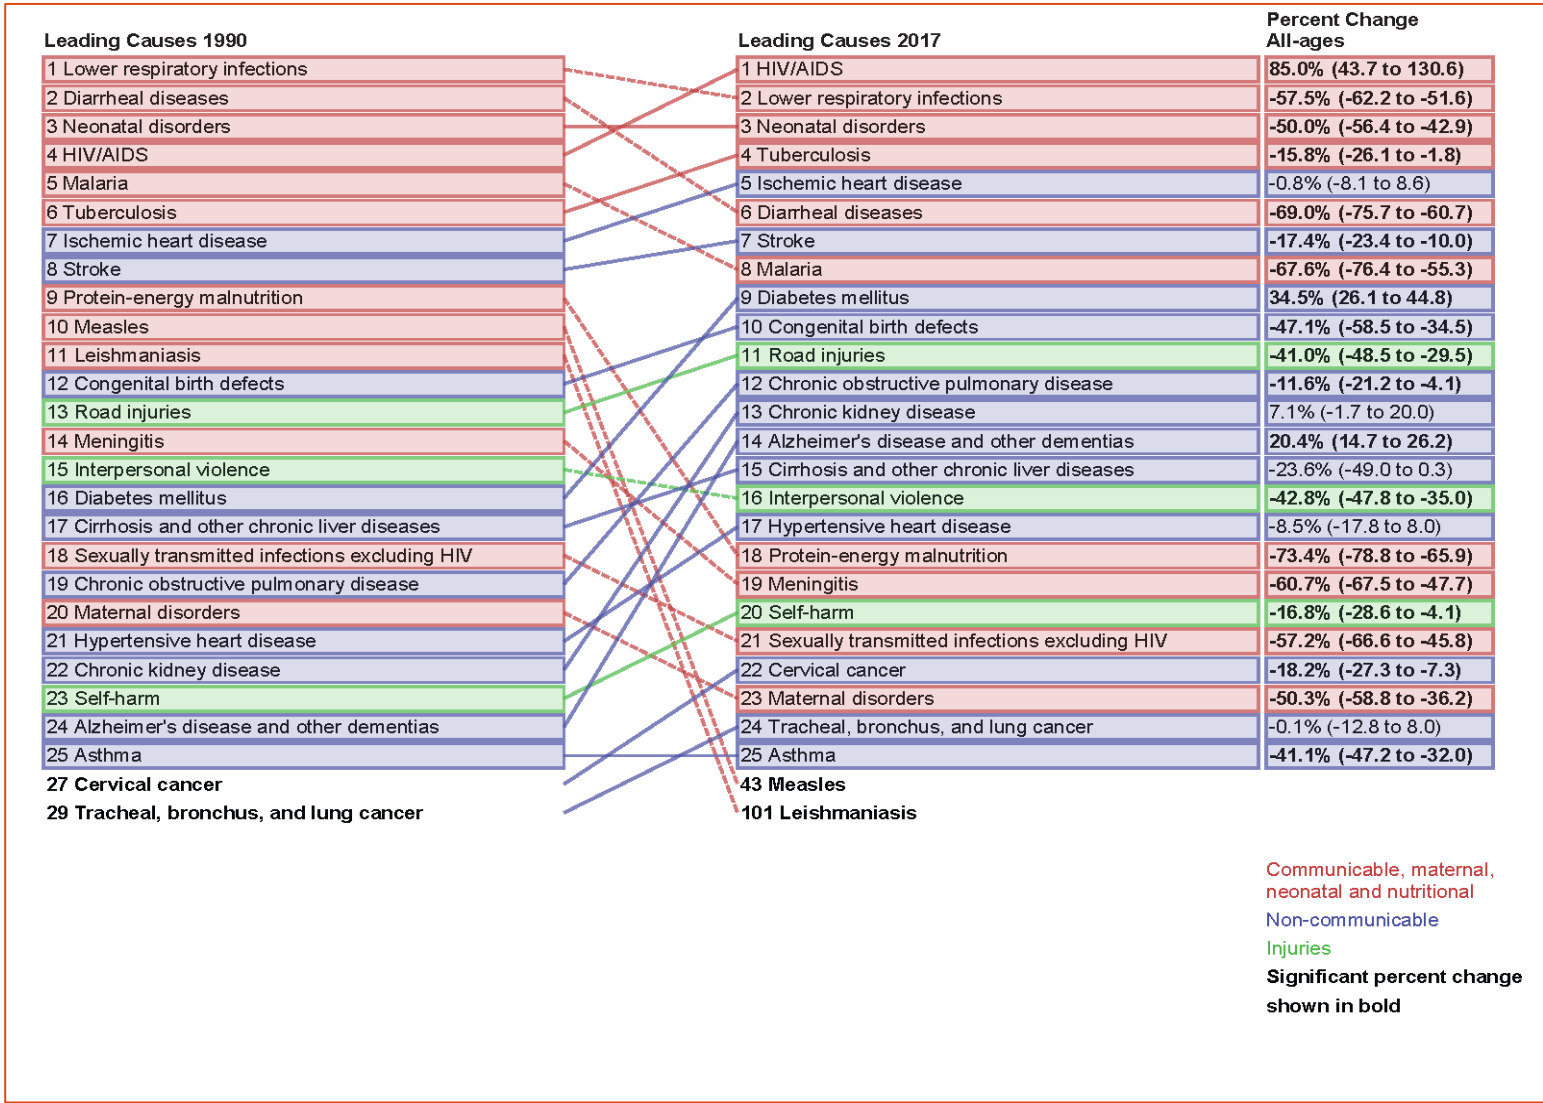

Figure 6: Leading causes of death and their evolution, all ages, Southern African Development Community, non-francophone countries, 1990–2017

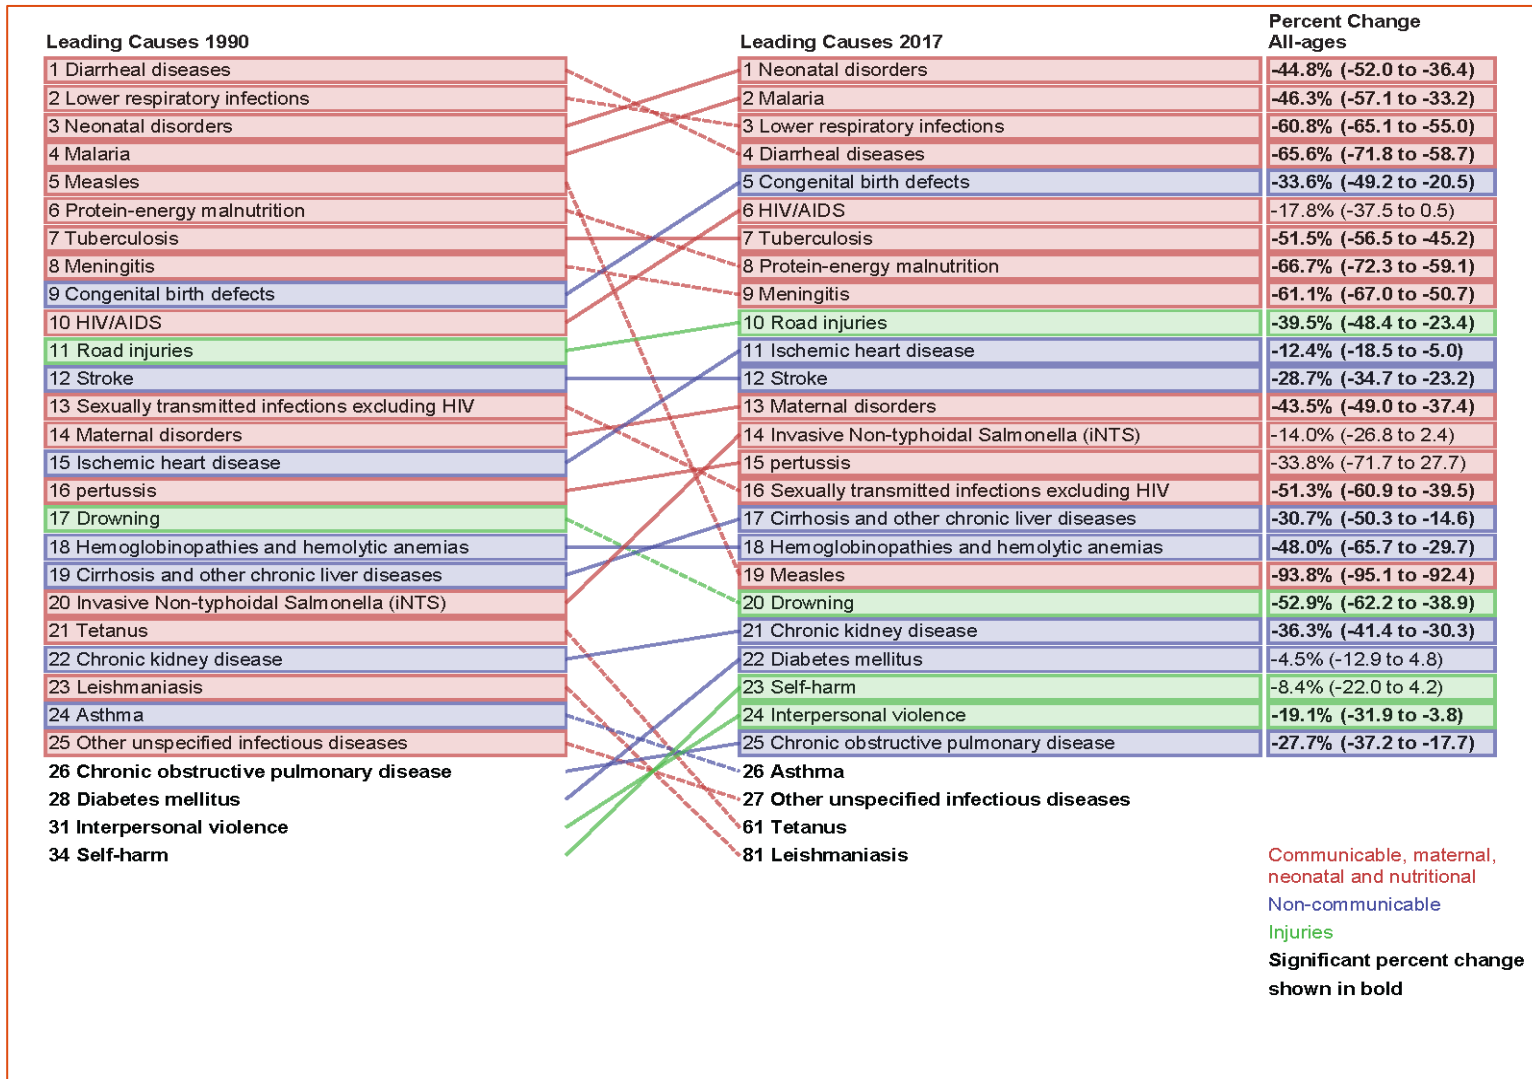

Figure 7: main causes of years of life lost and their evolution, all ages, francophone Africa, 1990–2017

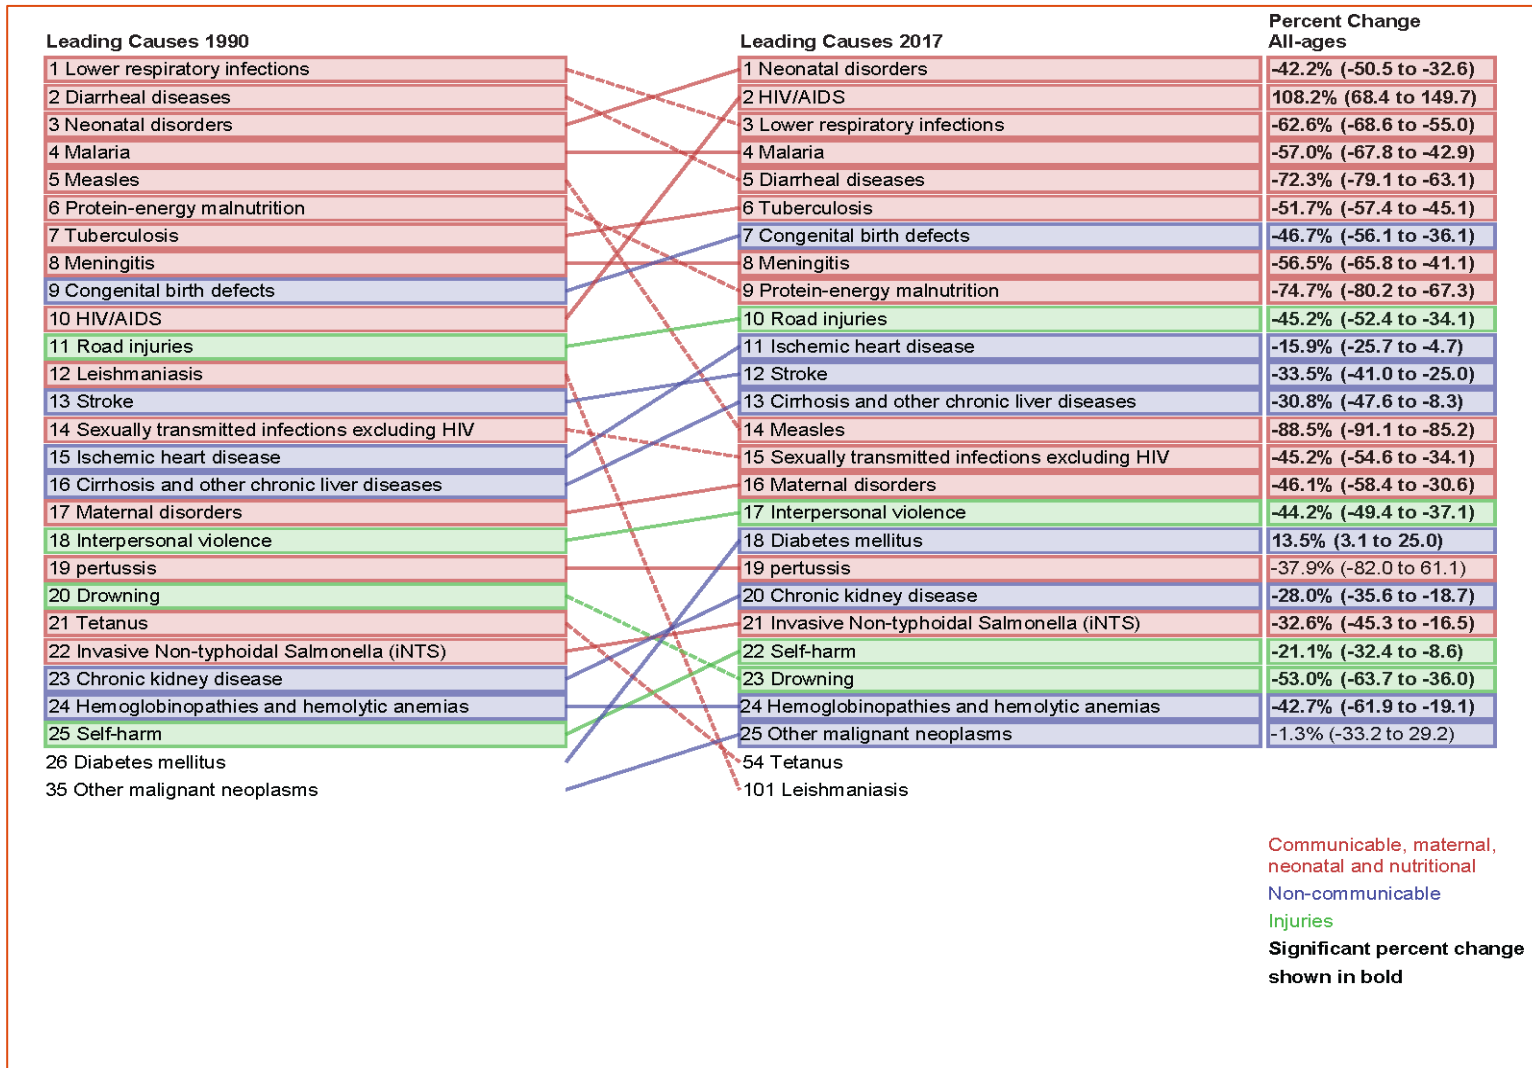

Figure 8: main causes of years of life lost and their evolution, all ages, non-francophone Africa, 1990–2017

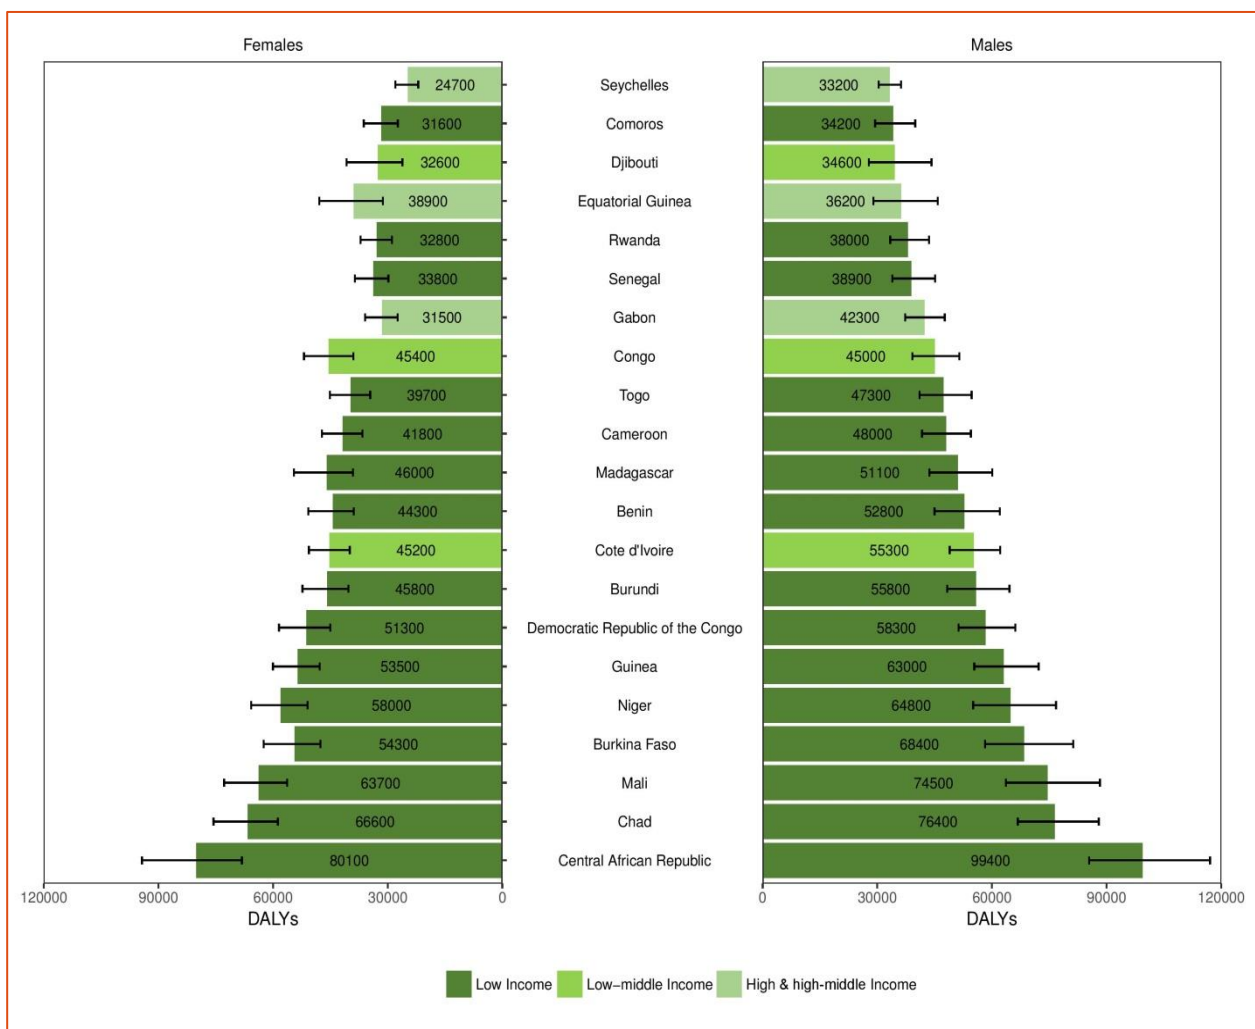

Figure 9: Disability-adjusted life-years (DALYs) per 100,000 population, and uncertainty intervals (black segments), all ages, by sex and country, francophone Africa, 2017

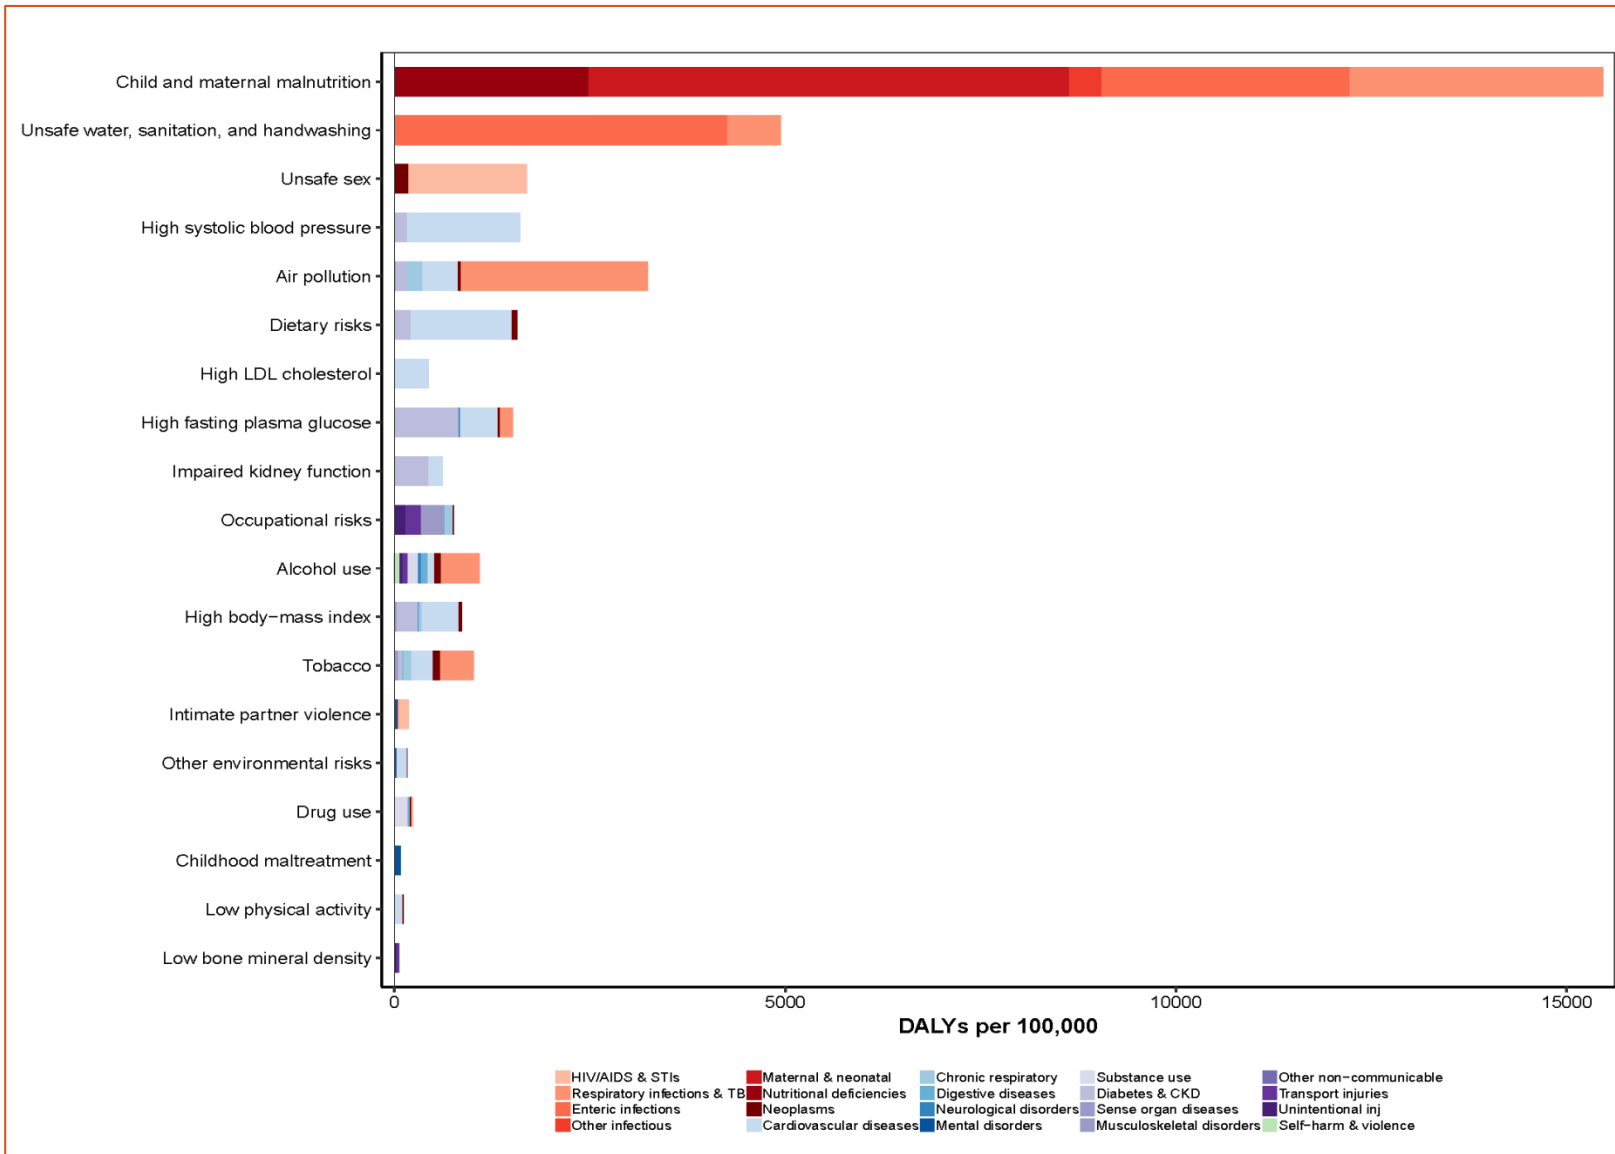

Figure 10: Risk factors by disability-adjusted life years, francophone Africa, 2017



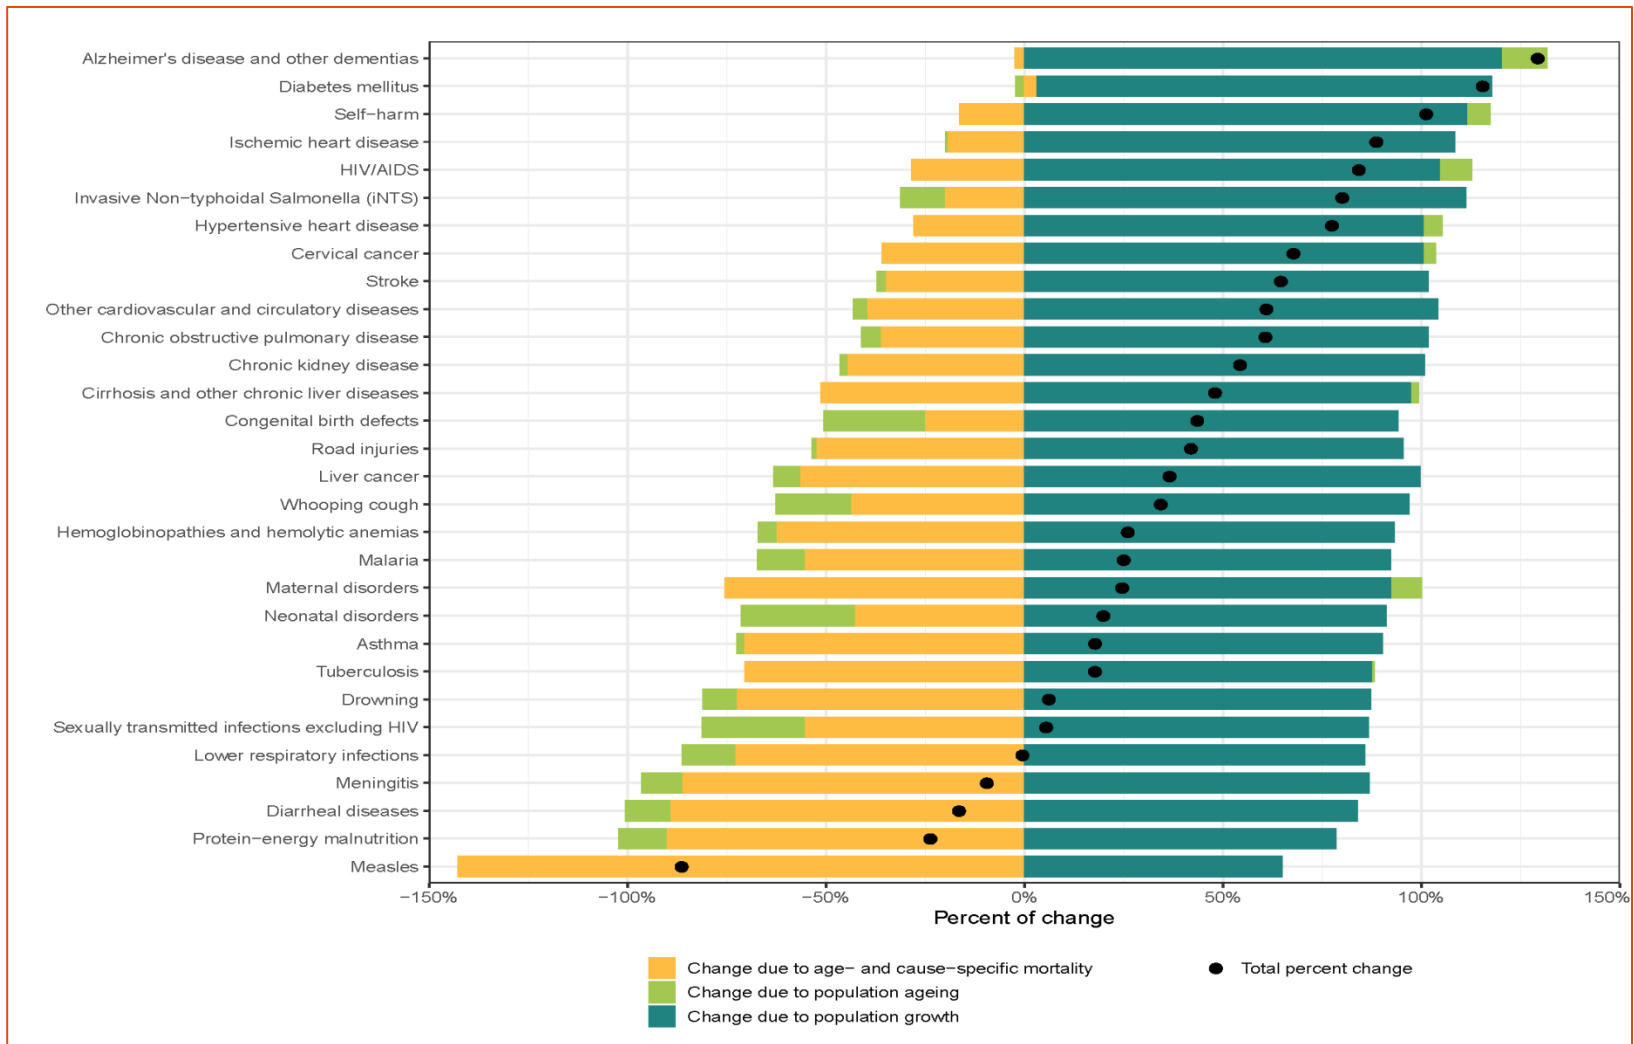

Figure 11: Decomposition of change among the 30 main causes of death due to population growth, population ageing, and age- and cause-specific mortality rate, francophone Africa, 1990–2017. For example, in the case on Alzheimer’s disease and other dementias, age- and cause-specific mortality have contributed to a small decrease in DALYs, but population growth and population ageing drove a large increase making the total percent change about 130%.

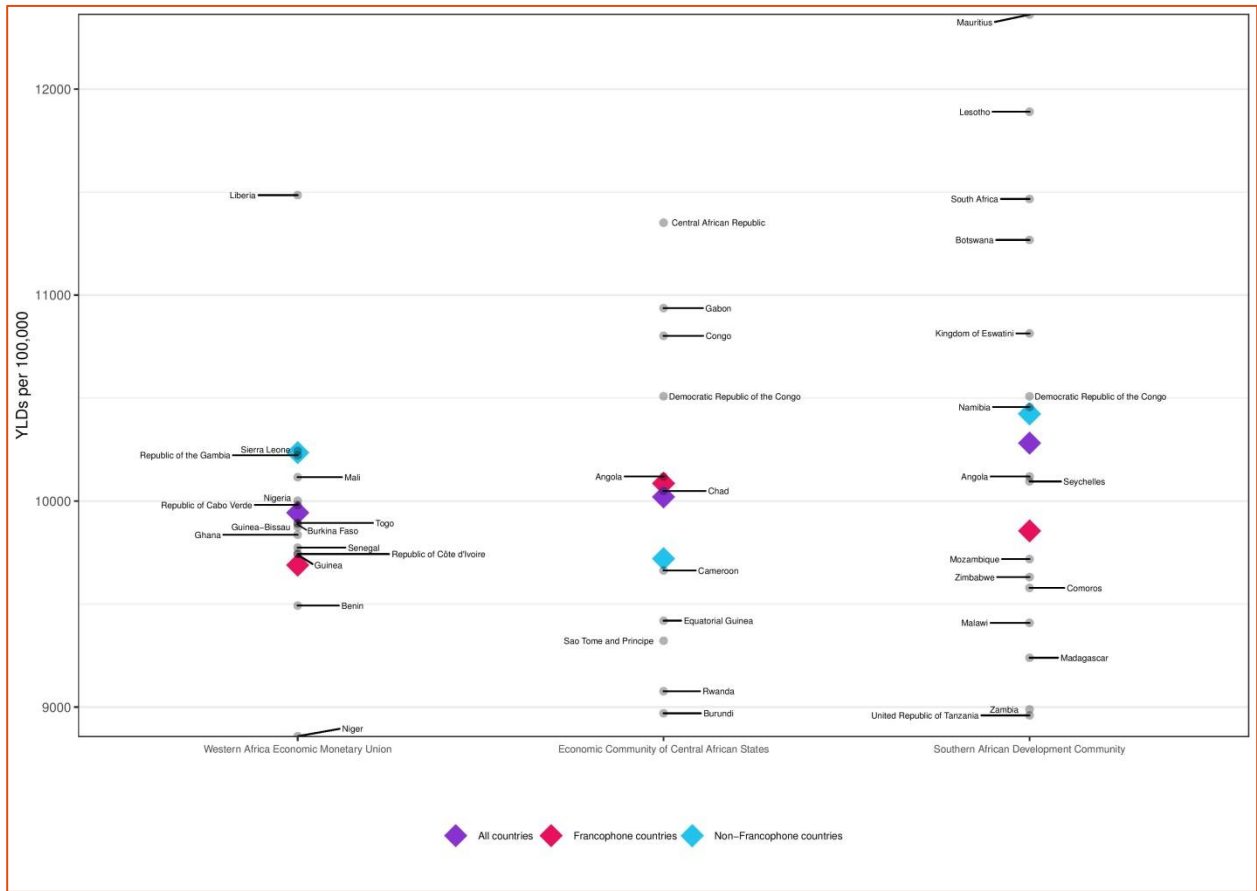

Figure 12: Years lived with disability (YLDs) in francophone (labeled to the right) and non-francophone (labelled to the left) countries, within the three economic communities

Table 3: Deaths, years of life lost (YLLs), years lived with disability (YLDs), and disability-adjusted life-years (DALYs) in 1990 and 2017, and life expectancy, expected DALYs, sociodemographic index (SDI) in 2017, and percent change in SDI between 1990 and 2017

| Location                       | 1990                   |                              |                          |                              | 2017                   |                           |                          |                            |                        |                             |                            | SDI  | Percent change in SDI from 1990-2017 |
|--------------------------------|------------------------|------------------------------|--------------------------|------------------------------|------------------------|---------------------------|--------------------------|----------------------------|------------------------|-----------------------------|----------------------------|------|--------------------------------------|
|                                | Deaths (per 100,000)   | YLLs (per 100,000)           | YLDs (per 100,000)       | DALYs (per 100,000)          | Deaths (per 100,000)   | YLLs (per 100,000)        | YLDs (per 100,000)       | DALYs (per 100,000)        | Life Expectancy        | Expected DALYs (per100,000) | Expected YLDs (per100,000) |      |                                      |
| Benin (BEN)                    | 1320<br>(1250 to 1390) | 85400<br>(80400 to 91000)    | 11300<br>(8270 to 14800) | 96600<br>(90400 to 103000)   | 697<br>(615 to 793)    | 39000<br>(33400 to 46300) | 9490<br>(7040 to 12500)  | 48500<br>(42200 to 56200)  | 64.6<br>(62.7 to 66.5) | 58257.08                    | 9762.98                    | 0.37 | 40.5%                                |
| Burkina Faso (BFA)             | 1590<br>(1510 to 1680) | 104000<br>(98600 to 111000)  | 12000<br>(8800 to 15800) | 117000<br>(110000 to 124000) | 866<br>(770 to 986)    | 51300<br>(43500 to 61100) | 9890<br>(7320 to 13000)  | 61100<br>(53000 to 71700)  | 61.7<br>(59.9 to 63.2) | 84844.96                    | 10197.89                   | 0.28 | 53.6%                                |
| Burundi (BDI)                  | 1580<br>(1480 to 1690) | 97500<br>(91000 to 104000)   | 9190<br>(6780 to 11900)  | 107000<br>(99400 to 114000)  | 751<br>(670 to 843)    | 41800<br>(36300 to 48400) | 8970<br>(6710 to 11600)  | 50800<br>(44600 to 58000)  | 61.6<br>(59.7 to 63.4) | 76297.43                    | 10050.75                   | 0.31 | 38.7%                                |
| Cameroon (CMR)                 | 1150<br>(1090 to 1210) | 71200<br>(66900 to 75900)    | 11000<br>(8190 to 14400) | 82100<br>(77100 to 87600)    | 689<br>(612 to 767)    | 35200<br>(30700 to 39800) | 9660<br>(7210 to 12600)  | 44800<br>(39700 to 50600)  | 63<br>(61.1 to 64.9)   | 40458.35                    | 9613.75                    | 0.48 | 29.2%                                |
| Central African Republic (CAF) | 1640<br>(1520 to 1760) | 98100<br>(90500 to 107000)   | 11900<br>(8830 to 15500) | 110000<br>(101000 to 120000) | 1380<br>(1210 to 1570) | 78300<br>(67200 to 92900) | 11400<br>(8490 to 14700) | 89700<br>(77900 to 105000) | 51.9<br>(49.8 to 54.1) | 68562.77                    | 9925.1                     | 0.33 | 24.2%                                |
| Chad (TCD)                     | 1670<br>(1570 to 1770) | 112000<br>(105000 to 119000) | 11200<br>(8240 to 14600) | 123000<br>(115000 to 131000) | 963<br>(860 to 1080)   | 61400<br>(53700 to 71000) | 10000<br>(7330 to 13100) | 71500<br>(62900 to 81400)  | 60<br>(58.2 to 61.8)   | 95945.32                    | 10401.52                   | 0.25 | 28.0%                                |
| Comoros (COM)                  | 1050<br>(966 to 1150)  | 62200<br>(56000 to 68100)    | 9800<br>(7170 to 12900)  | 72000<br>(65500 to 78600)    | 615<br>(549 to 683)    | 23300<br>(20200 to 27300) | 9580<br>(7120 to 12400)  | 32900<br>(28900 to 37700)  | 68.6<br>(67.1 to 70.2) | 46806.31                    | 9620.36                    | 0.43 | 37.2%                                |
| Congo (COG)                    | 1240<br>(1140 to 1340) | 65300<br>(60000 to 70800)    | 10900<br>(8170 to 14300) | 76200<br>(70400 to 82400)    | 772<br>(686 to 872)    | 34400<br>(30100 to 39500) | 10800<br>(8030 to 14000) | 45200<br>(39800 to 51100)  | 62.7<br>(60.8 to 64.6) | 32604.6                     | 10003.77                   | 0.57 | 33.3%                                |
| Cote d'Ivoire (CIV)            | 1150<br>(1060 to 1280) | 75500<br>(69600 to 83000)    | 10600<br>(7750 to 13800) | 86100<br>(79100 to 94800)    | 741<br>(663 to 819)    | 40600<br>(35900 to 46000) | 9740<br>(7220 to 12800)  | 50400<br>(44900 to 56400)  | 62.5<br>(60.6 to 64.3) | 51105.01                    | 9663.38                    | 0.41 | 31.7%                                |

|                                        |                        |                              |                          |                              |                      |                           |                          |                           |                        |           |           |      |       |
|----------------------------------------|------------------------|------------------------------|--------------------------|------------------------------|----------------------|---------------------------|--------------------------|---------------------------|------------------------|-----------|-----------|------|-------|
| Democratic Republic of the Congo (COD) | 1330<br>(1240 to 1410) | 85600<br>(79700 to 91500)    | 11600<br>(8440 to 15100) | 97200<br>(90300 to 104000)   | 795<br>(714 to 884)  | 44300<br>(38500 to 50700) | 10500<br>(7810 to 13700) | 54800<br>(48500 to 62000) | 62.4<br>(60.7 to 64.1) | 60612.28  | 9799.76   | 0.36 | 22.2% |
| Djibouti (DJ)                          | 770<br>(657 to 896)    | 49600<br>(42600 to 57000)    | 8350<br>(6130 to 10900)  | 57900<br>(50700 to 65700)    | 559<br>(431 to 734)  | 24700<br>(18600 to 33300) | 8940<br>(6650 to 11500)  | 33600<br>(27100 to 42700) | 67.4<br>(64.1 to 70.2) | 39860.25  | 9619.01   | 0.48 | 58.3% |
| Equatorial Guinea (GNQ)                | 1770<br>(1550 to 2010) | 109000<br>(95200 to 125000)  | 11700<br>(8560 to 15500) | 121000<br>(107000 to 137000) | 540<br>(413 to 702)  | 28000<br>(21300 to 36900) | 9420<br>(7070 to 12200)  | 37400<br>(30400 to 46700) | 65.5<br>(62 to 68.8)   | 30856.14  | 10418.34  | 0.63 | 54.0% |
| Gabon (GAB)                            | 1030<br>(961 to 1100)  | 47800<br>(44200 to 51500)    | 11300<br>(8280 to 14600) | 59100<br>(54000 to 64000)    | 654<br>(593 to 716)  | 25800<br>(22800 to 28900) | 10900<br>(8210 to 14100) | 36700<br>(32500 to 41200) | 68.4<br>(66.9 to 69.7) | 30193.24  | 10627.78  | 0.65 | 29.2% |
| Guinea (GIN)                           | 1800<br>(1700 to 1890) | 119000<br>(110000 to 126000) | 10700<br>(7870 to 13900) | 129000<br>(121000 to 137000) | 918<br>(834 to 1020) | 48400<br>(42300 to 55900) | 9740<br>(7220 to 12600)  | 58100<br>(51600 to 65700) | 60.7<br>(59.1 to 62.3) | 71532.98  | 9972.47   | 0.32 | 34.4% |
| Madagascar (MDG)                       | 1250<br>(1190 to 1310) | 77800<br>(73400 to 82700)    | 10200<br>(7470 to 13300) | 87900<br>(82300 to 93800)    | 708<br>(617 to 816)  | 39300<br>(33100 to 47500) | 9240<br>(6950 to 12100)  | 48500<br>(41600 to 57000) | 63.5<br>(61.6 to 65.4) | 70026.43  | 9948.33   | 0.33 | 24.2% |
| Mali (MLI)                             | 1920<br>(1830 to 2010) | 133000<br>(126000 to 141000) | 11400<br>(8440 to 15200) | 144000<br>(137000 to 153000) | 920<br>(813 to 1050) | 59000<br>(50500 to 69800) | 10100<br>(7450 to 13300) | 69100<br>(59900 to 80300) | 62<br>(60.2 to 63.5)   | 92215.71  | 103059.81 | 0.27 | 48.1% |
| Niger (NER)                            | 2080<br>(1960 to 2200) | 156000<br>(146000 to 167000) | 9990<br>(7340 to 13200)  | 166000<br>(156000 to 177000) | 809<br>(709 to 929)  | 52500<br>(44900 to 62200) | 8860<br>(6600 to 11600)  | 61400<br>(53200 to 71100) | 62.4<br>(60.5 to 64.1) | 123593.81 | 10934.33  | 0.19 | 26.3% |
| Rwanda (RWA)                           | 1550<br>(1480 to 1620) | 93600<br>(89100 to 98200)    | 9090<br>(6740 to 11800)  | 103000<br>(97500 to 108000)  | 543<br>(493 to 598)  | 26200<br>(23200 to 30200) | 9080<br>(6770 to 11700)  | 35300<br>(31300 to 40000) | 68.5<br>(67.1 to 69.9) | 52028.61  | 9674.84   | 0.41 | 56.1% |
| Senegal (SEN)                          | 1140<br>(1070 to 1200) | 71000<br>(66100 to 75800)    | 10800<br>(7840 to 14200) | 81700<br>(76200 to 87900)    | 596<br>(542 to 658)  | 26600<br>(23200 to 30900) | 9770<br>(7280 to 12600)  | 36300<br>(32000 to 41700) | 68<br>(66.7 to 69.3)   | 58257.08  | 9762.98   | 0.37 | 35.1% |
| Seychelles (SYC)                       | 740<br>(724 to 758)    | 20600<br>(20000 to 21300)    | 8650<br>(6460 to 11100)  | 29300<br>(27000 to 31900)    | 756<br>(727 to 785)  | 19100<br>(18200 to 19900) | 10100<br>(7560 to 13100) | 29200<br>(26500 to 32100) | 73.6<br>(73.1 to 74.1) | 29076.79  | 10924.45  | 0.69 | 13.0% |
| Togo (TGO)                             | 1060<br>(986 to 1140)  | 70000<br>(64600 to 75800)    | 10100<br>(7460 to 13200) | 80100<br>(74200 to 86900)    | 671<br>(599 to 756)  | 33500<br>(29300 to 39100) | 9890<br>(7320 to 12900)  | 43400<br>(38200 to 49300) | 64.4<br>(62.6 to 66.2) | 50212.42  | 9652.85   | 0.41 | 39.0% |
| Total                                  | 1423<br>(1395 to 1451) | 92542<br>(90648 to 94501)    | 10887<br>(8034 to 14089) | 103429<br>(100053 to 107349) | 779<br>(750 to 809)  | 43708<br>(41673 to 45742) | 9862<br>(7331 to 12749)  | 53570<br>(50164 to 57361) | 64<br>(62.1 to 65.74)  | 67796.81  | 9963.50   | 0.35 | 31.4% |

Table 4: cause of death star rating for vital registration systems, francophone Africa

| <b>Location</b>                  | <b>Rating (0 – 5)</b> | <b>Stars</b> |
|----------------------------------|-----------------------|--------------|
| Central African Republic         | 0                     | ☆☆☆☆☆        |
| Congo                            | 0                     | ☆☆☆☆☆        |
| Democratic Republic of the Congo | 1                     | ★☆☆☆☆        |
| Equatorial Guinea                | 0                     | ☆☆☆☆☆        |
| Gabon                            | 0                     | ☆☆☆☆☆        |
| Burundi                          | 1                     | ★☆☆☆☆        |
| Comoros                          | 0                     | ☆☆☆☆☆        |
| Djibouti                         | 0                     | ☆☆☆☆☆        |
| Madagascar                       | 1                     | ★☆☆☆☆        |
| Rwanda                           | 1                     | ★☆☆☆☆        |
| Seychelles                       | 3                     | ★★★☆☆        |
| Benin                            | 1                     | ★☆☆☆☆        |
| Burkina Faso                     | 1                     | ★☆☆☆☆        |
| Cameroon                         | 0                     | ☆☆☆☆☆        |
| Chad                             | 0                     | ☆☆☆☆☆        |
| Cote d'Ivoire                    | 1                     | ★☆☆☆☆        |
| Guinea                           | 1                     | ★☆☆☆☆        |
| Mali                             | 1                     | ★☆☆☆☆        |
| Niger                            | 1                     | ★☆☆☆☆        |
| Senegal                          | 1                     | ★☆☆☆☆        |
| Togo                             | 0                     | ☆☆☆☆☆        |
